# Supplementary material for: Rice phytochelatin synthases OsPCS1 and OsPCS2 make different contributions to cadmium and arsenic tolerance
Source: PubMed Central journal article supplement (PMC6508543; doi:10.1002/pld3.34), 2018-01-09
Supplement: PLD3-2-e00034-s001.pdf [file PLD3-2-e00034-s001.pdf]

(A) *OsPCSI*

```
Genome 161>TTTTGCCGCAATGGCGTCTAAACCAAGCAGCCGAGCGGAAAGCAACCAGGCGGCGGCGGCGGTGCCGTGCGTGTACGGGC>240
CB646798 1>~~~~~ATGGCGTCTAAACCAAGCAGCCGAGCGGAAAGCAACCAGGCGGCGGCGGCGGTGCCGTGCGTGTACGGGC>70
OsPCSI#1 161>TTTTGCCGCAATGGCGTCTAAACCAAGCAGCCGAGCGGAAAGCAACCAGGCGGCGGCGGCGGTGCCGTGCGTGTACGGGC>240
OsPCSI#2 1>~~~~~ATGGCGTCTAAACCAAGCAGCCGAGCGGAAAGCAACCAGGCGGCGGCGGCGGTGCCGTGCGTGTACGGGC>70
OsPCSI#3 1>~~~~~ATGGCGTCTAAACCAAGCAGCCGAGCGGAAAGCAACCAGGCGGCGGCGGCGGTGCCGTGCGTGTACGGGC>70
OsPCSI#4 1>~~~~~ATGGCGTCTAAACCAAGCAGCCGAGCGGAAAGCAACCAGGCGGCGGCGGCGGTGCCGTGCGTGTACGGGC>70
* * * * *
Genome 641>GGATTGCCATCTCGTCGCCTCTACCACCGGAAGCTTCTCGGCCAGTTGCTGCCTGCTCGTCGCACCTCTCTCGGAAC>720
CB646798 471>GGATTGCCATCTCGTCGCCTCTACCACCGGAAGCTTCTCGGCCAG----->516
OsPCSI#1 641>GGATTGCCATCTCGTCGCCTCTACCACCGGAAGCTTCTCGGCCAG----->686
OsPCSI#2 471>GGATTGCCATCTCGTCGCCTCTACCACCGGAAGCTTCTCGGCCAG----->516
OsPCSI#3 471>GGATTGCCATCTCGTCGCCTCTACCACCGGAAGCTTCTCGGCCAG----->516
OsPCSI#4 471>GGATTGCCATCTCGTCGCCTCTACCACCGGAAGCTTCTCGGCCAG----->516
* * * * *
Genome 721>TCGAATTCGACGATTTCTGTTTCTGTTTCTGAACGAATGATGTTTGTGTTGGATTTCGATGCAGACTGGAACAGGGCA>800
CB646798 517>-----ACTGGAACAGGGCA>530
OsPCSI#1 687>-----ACTGGAACAGGGCA>700
OsPCSI#2 517>-----ACTGGAACAGGGCA>530
OsPCSI#3 517>-----ACTGGAACAGGGCA>530
OsPCSI#4 517>-----ACTGGAACAGGGCA>530
* * * * *
Genome 881>ATTGGATTCCGCTGCCGCTTCTTTGGGAAGCCATGAACACGATTGATGAAGCAACTGGGCTTCTCAGGGGTTATATATTC>960
CB646798 611>ATTGGATTCCGCTGCCGCTTCTTTGGGAAGCCATGAACACGATTGATGAAGCAACTGGGCTTCTCAGGGG----->680
OsPCSI#1 781>ATTGGATTCCGCTGCCGCTTCTTTGGGAAGCCATGAACACGATTGATGAAGCAACTGGGCTTCTCAGGGG----->850
OsPCSI#2 611>ATTGGATTCCGCTGCCGCTTCTTTGGGAAGCCATGAACACGATTGATGAAGCAACTGGGCTTCTCAGGGG----->680
OsPCSI#3 611>ATTGGATTCCGCTGCCGCTTCTTTGGGAAGCCATGAACACGATTGATGAAGCAACTGGGCTTCTCAGGGG----->680
OsPCSI#4 611>ATTGGATTCCGCTGCCGCTTCTTTGGGAAGCCATGAACACGATTGATGAAGCAACTGGGCTTCTCAGGGG----->680
* * * * *
Genome 1761>GTTTAAACATGTCGGCATCTTCATATTTGGTAGGTTTCATGCTTATCTCAAGGAATACTGAAGCTCCTTTATTGATCCGTGC>1840
CB646798 681>-----GTTTCATGCTTATCTCAAGGAATACTGAAGCTCCTTTATTGATCCGTGC>728
OsPCSI#1 851>-----GTTTCATGCTTATCTCAAGGAATACTGAAGCTCCTTTATTGATCCGTGC>898
OsPCSI#2 681>-----GTTTCATGCTTATCTCAAGGAATACTGAAGCTCCTTTATTGATCCGTGC>728
OsPCSI#3 680>-----GTTTCATGCTTATCTCAAGGAATACTGAAGCTCCTTTATTGATCCGTGC>680
OsPCSI#4 681>-----GTTTCATGCTTATCTCAAGGAATACTGAAGCTCCTTTATTGATCCGTGC>728
* * * * *
Genome 1841>AGTGGTAAATTAACATGCCAATGCTTGGTGAATCAAATATGTAAGTGTCAAGTGTACCCTTGATCTATTTTTTCTCAT>1920
CB646798 729>AGTG----->732
OsPCSI#1 899>AGTG----->902
OsPCSI#2 729>AGTG----->732
OsPCSI#3 681>--TGGTAAATTAACATGCCAATGCTTGGTGAATCAAATAT----->718
OsPCSI#4 729>AGTGGTAAATTAACATGCCAATGCTTGGTGAATCAAATAT----->768
* * * * *
Genome 1921>TCCTTTCAATGCTATGCAGAAATTGCAGGGATGAAAGCTGGCAAAGCATGGCAAAGTATTGCATAGAAGTTGTCCCAAATC>2000
CB646798 733>-----AATTGCAGGGATGAAAGCTGGCAAAGCATGGCAAAGTATTGCATAGAAGTTGTCCCAAATC>775
CK083842 8>-----AGAAAGTTGTCCCAAATC>24
OsPCSI#1 903>-----AATTGCAGGGATGAAAGCTGGCAAAGCATGGCAAAGTATTGCATAGAAGTTGTCCCAAATC>963
OsPCSI#2 733>-----AATTGCAGGGATGAAAGCTGGCAAAGCATGGCAAAGTATTGCATAGAAGTTGTCCCAAATC>793
OsPCSI#3 718>-----AATTGCAGGGATGAAAGCTGGCAAAGCATGGCAAAGTATTGCATAGAAGTTGTCCCAAATC>718
OsPCSI#4 768>-----AATTGCAGGGATGAAAGCTGGCAAAGCATGGCAAAGTATTGCATAGAAGTTGTCCCAAATC>768
* * * * *
Genome 2001>TTTTGAGGGATAACAGCGTAGACAATGTCCTAACAATTCCTTCCCGTTTAGTGAATCATCTTCCTCCCAATGCTGGAAAT>2080
CK083842 25>TTTTGAGGGATAACAGCGTAGACAATGTCCTAACAATTCCTTCCCGTTTAGTGAATCATCTTCCTCCCAATGCTGGAAAT>104
OsPCSI#1 964>TTTTGAGGGATAACAGCGTAGACAATGTCCTAACAATTCCTTCCCGTTTAGTGAATCATCTTCCTCCCAATGCTGGAAAT>1043
OsPCSI#2 794>TTTTGAGGGATAACAGCGTAGACAATGTCCTAACAATTCCTTCCCGTTTAGTGAATCATCTTCCTCCCAATGCTGGAAAT>873
OsPCSI#3 719>-----TGAATCATCTTCCTCCCAATGCTGGAAAT>747
OsPCSI#4 769>-----TGAATCATCTTCCTCCCAATGCTGGAAAT>797
* * * * *
Genome 2161>CCTGAAGGTCATTTTAATTTTCCATTTCTGTTGTTGGGTGAGTTTGTTCCTCTGTTCAACCAGTTAATGTTGTATGTT>2240
CK083842 185>CCTGAAG----->191
OsPCSI#1 1124>CCTGAAG----->1130
OsPCSI#2 954>CCTGAAG----->960
OsPCSI#3 828>CCTGAAG----->834
OsPCSI#4 878>CCTGAAG----->884
* * * * *
Genome 2241>CGCTTGCAAGGAAAGGTCCTACAGCAAATCCGTGATACTAAGCTTTTTCAGCTGGTCCACAAACTGCAATGTTCTAAGCA>2320
CK083842 192>-----GAAAAGATCCTACAGCAAATCCGTGATACTAAGCTTTTTCAGCTGGTCCACAAACTGCAATGTTCTAAGCA>262
CB646798 794<-----GCAAATCCGTGATACTAAGCTTTTTCAGCTGGTCCACAAACTGCAATGTTCTAAGCA<739
OsPCSI#1 1131>-----GAAAAGGTCCTACAGCAAATCCGTGATACTAAGCTTTTTCAGCTGGTCCACAAACTGCAATGTTCTAAGCA>1201
OsPCSI#2 961>-----GAAAAGGTCCTACAGCAAATCCGTGATACTAAGCTTTTTCAGCTGGTCCACAAACTGCAATGTTCTAAGCA>1031
OsPCSI#3 835>-----GAAAAGGTCCTACAGCAAATCCGTGATACTAAGCTTTTTCAGCTGGTCCACAAACTGCAATGTTCTAAGCA>905
OsPCSI#4 885>-----GAAAAGGTCCTACAGCAAATCCGTGATACTAAGCTTTTTCAGCTGGTCCACAAACTGCAATGTTCTAAGCA>955
* * * * *
```

Genome 2321>GCCCTGTTGTAGTTGCTCGTCTTTAACGGACGAAGATTCATTTCCAGATTGCAGCCAGTGTGTGCTGTGAAGCAACCG>2400  
CK083842 263>GCCCTGTTGTAGTTGCTCGTCTTTAACGGACGAAGATTCATTTCCAGATTGCAGCCAGTGTGTGCTGTGAAGCAACCG>342  
CB646799 738<GCCCTGTTGTAGTTGCTCGTCTTTAACGGACGAAGATTCATTTCCAGATTGCAGCCAGTGTGTGCTGTGAAGCAACCG>659  
OsPCS1#1 1202>GCCCTGTTGTAGTTGCTCGTCTTTAACGGACGAAGATTCATTTCCAGATTGCAGCCAGTGTGTGCTGTGAAGCAACCG>1281  
OsPCS1#2 1032>GCCCTGTTGTAGTTGCTCGTCTTTAACGGACGAAGATTCATTTCCAGATTGCAGCCAGTGTGTGCTGTGAAGCAACCG>1111  
OsPCS1#3 906>GCCCTGTTGTAGTTGCTCGTCTTTAACGGACGAAGATTCATTTCCAGATTGCAGCCAGTGTGTGCTGTGAAGCAACCG>985  
OsPCS1#4 956>GCCCTGTTGTAGTTGCTCGTCTTTAACGGACGAAGATTCATTTCCAGATTGCAGCCAGTGTGTGCTGTGAAGCAACCG>1035  
\* \* \* \* \*  
Genome 2481>GAGGGGCTTAAAAATGTCATTACAGGCAAAGTGGTATCTGAAGGCAATGGACATGTTGATAAGCTTTCACCGATATCCTC>2560  
CK083842 423>GAGGGGCTTAAAAATGTCATTACAGGCAAAGTGGTATCTGAAGGCAATGGACATGTTGATAAGCTTTCACCGATATCCTC>502  
CB646799 578<GAGGGGCTTAAAAATGTCATTACAGGCAAAGTGGTATCTGAAGGCAATGGACATGTTGATAAGCTTTCACCGATATCCTC>499  
OsPCS1#1 1362>GAGGGGCTTAAAAATGTCATTACAGGCAAAGTGGTATCTGAAGGCAATGGACATGTTGATAAGCTTTCACCGATATCCTC>1441  
OsPCS1#2 1192>GAGGGGCTTAAAAATGTCATTACAGGCAAAGTGGTATCTGAAGGCAATGGACATGTTGATAAGCTTTCACCGATATCCTC>1271  
OsPCS1#3 1066>GAGGGGCTTAAAAATGTCATTACAGGCAAAGTGGTATCTGAAGGCAATGGACATGTTGATAAGCTTTCACCGATATCCTC>1145  
OsPCS1#4 1116>GAGGGGCTTAAAAATGTCATTACAGGCAAAGTGGTATCTGAAGGCAATGGACATGTTGATAAGCTTTCACCGATATCCTC>1195  
\* \* \* \* \*  
Genome 2561>GACTGAAACATGCTTCTGCAATTCACACTCTGAGCAATGAAA-CTGTC-AATTATCCATCAAACACAGAC-ATTCTAACTG>2637  
CK083842 503>GACTGAAACATGCTTCTGCAATTCACACTCTGAGCAATGAAA-CTGTC-AATTATCCATCAAACACAGAC-ATTCTAACTG>579  
CB646799 498<GACTGAAACATGCTTCTGCAATTCACACTCTGAGCAATGAAA-CTGTC-AATTATCCATCAAACACAGAC-ATTCTAACTG>422  
C96924 32>-----AAACATGCTTCTGCAATTCACACTCTGAGCAATGAAA-CTGTC-AATTATCCATCAAACACAGAC-ATTCTAACTG>106  
OsPCS1#1 1442>GACTGAAACATGCTTCTGCAATTCACACTCTGAGCAATGAAA-CTGTC-AATTATCCATCAAACACAGAC-ATTCTAACTG>1518  
OsPCS1#2 1272>GACTGAAACATGCTTCTGCAATTCACACTCTGAGCAATGAAA-CTGTC-AATTATCCATCAAACACAGAC-ATTCTAACTG>1348  
OsPCS1#3 1146>GACTGAAACATGCTTCTGCAATTCACACTCTGAGCAATGAAA-CTGTC-AATTATCCATCAAACACAGAC-ATTCTAACTG>1222  
OsPCS1#4 1196>GACTGAAACATGCTTCTGCAATTCACACTCTGAGCAATGAAA-CTGTC-AATTATCCATCAAACACAGAC-ATTCTAACTG>1272  
\* \* \* \* \*  
Genome 2638>TTCTATTACTGTCGTTACATCCTAGCACATGGTTGTGCATTGAAGATGAGAAGTTGAAAGCTGAATTTTCAGAGCCTTGTT>2717  
CK083842 580>TTCTATTACTG~>590  
CB646799 421<TTCTATTACTGTCGTTACATCCTAGCACATGGTTGTGCATTGAAGATGAGAAGTTGAAAGCTGAATTTTCAGAGCCTTGTT>342  
C96924 107>TTCTATTACTGTCGTTACATCCTAGCACATGGTTGTGCATTGAAGATGAGAAGTTGAAAGCTGAATTTTCAGAGCCTTGTT>186  
OsPCS1#1 1519>TTCTATTACTGTCGTTACATCCTAGCACATGGTTGTGCATTGAAGATGAGAAGTTGAAAGCTGAATTTTCAGAGCCTTGTT>1598  
OsPCS1#2 1349>TTCTATTACTGTCGTTACATCCTAGCACATGGTTGTGCATTGAAGATGAGAAGTTGAAAGCTGAATTTTCAGAGCCTTGTT>1428  
OsPCS1#3 1223>TTCTATTACTGTCGTTACATCCTAGCACATGGTTGTGCATTGAAGATGAGAAGTTGAAAGCTGAATTTTCAGAGCCTTGTT>1302  
OsPCS1#4 1273>TTCTATTACTGTCGTTACATCCTAGCACATGGTTGTGCATTGAAGATGAGAAGTTGAAAGCTGAATTTTCAGAGCCTTGTT>1352  
\* \* \* \* \*  
Genome 2718>TCTACGGACGATCTTCCTGATCCTCTTAAACTGGAGGTGTGCTGTCTCACTCCTAGAACCTTGCAATGATTGTTTACCT>2797  
CB646799 341<TCTACGGACGATCTTCCTGATCCTCTTAAACTGGAG----->306  
C96924 187>TCTACGGACGATCTTCCTGATCCTCTTAAACTGGAG----->222  
OsPCS1#1 1599>TCTACGGACGATCTTCCTGATCCTCTTAAACTGGAG----->1634  
OsPCS1#2 1429>TCTACGGACGATCTTCCTGATCCTCTTAAACTGGAGGTGTGCTGTCTCACTCCTAGAACCTTGCAATGATTGTTTACCT>1497  
OsPCS1#3 1303>TCTACGGACGATCTTCCTGATCCTCTTAAACTGGAGGTGTGCTGTCTCACTCCTAGAACCTTGCAATGATTGTTTACCT>1371  
OsPCS1#4 1353>TCTACGGACGATCTTCCTGATCCTCTTAAACTGGAGGTGTGCTGTCTCACTCCTAGAACCTTGCAATGATTGTTTACCT>1421  
\* \* \* \* \*  
Genome 3358>TCTATTCTAAGTAGAGCTACTATTTATATTGACAGATATTGCACCTAAGGAGGCAGCTCCGTTATCTGAAGGCTTGTAGA>3437  
CB646799 305<-----ATATTGCACCTAAGGAGGCAGCTCCGTTATCTGAAGGCTTGTAGA>261  
C96924 223>-----ATATTGCACCTAAGGAGGCAGCTCCGTTATCTGAAGGCTTGTAGA>267  
OsPCS1#1 1635>-----ATATTGCACCTAAGGAGGCAGCTCCGTTATCTGAAGGCTTGTAGA>1679  
\* \* \* \* \*  
Genome 3438>GAAAAGGAGGCATATGAAGATACTTGGCCACAACCTTGGGAACAATGCTAACATGGCAACCCACTCACTTAATAATGAAT>3517  
CB646799 260<GAAAAGGAGGCATATGAAGATACTTGGCCACAACCTTGGGAACAATGCTAACATGGCAACCCACTCACTTAATAATGAAT>181  
C96924 268>GAAAAGGAGGCATATGAAGATACTTGGCCACAACCTTGGGAACAATGCTAACATGGCAACCCACTCACTTAATAATGAAT>347  
OsPCS1#1 1680>GAAAAGGAGGCATATGAAGATACTTGGCCACAACCTTGGGAACAATGCTAACATGGCAACCCACTCACTTAATAATGAAT>1759  
\* \* \* \* \*

(B) OsPCS2

```
* * * * *
Genome      81>AGAGAAGCAGCATCCGATCGCCGGCGACGACCGAATCTGTGCCGGCGGCAGGAAGGAGAGCGGCGATGGCAGCGATGG>160
OsPCS2#1   81>AGAGAAGCAGCATCCGATCGCCGGCGACGACCGAATCTGTGCCGGCGGCAGGAAGGAGAGCGGCGATGGCAGCGATGG>160
OsPCS2#2   81>AGAGAAGCAGCATCCGATCGCCGGCGACGACCGAATCTGTGCCGGCGGCAGGAAGGAGAGCGGCGATGGCAGCGATGG>160
AK071958   0>~~~~~>0
OsPCS2#3   1>~~~~~ATGGCAGCGATGG>13
          * * * * *
          * * * * *
Genome      561>CTCTGCCTCCTCCAGGACTGCCATCTCATCGCATCTACCACAGGAAGCCTTTCAAACAGGTTGTTTTTGTAAATCCTT>640
OsPCS2#1   561>CTCTGCCTCCTCCAGGACTGCCATCTCATCGCATCTACCACAGGAAGCCTTTCAAACAG----->621
OsPCS2#2   561>CTCTGCCTCCTCCAGGACTGCCATCTCATCGCATCTACCACAGGAAGCCTTTCAAACAG----->621
AK071958   0>~~~~~>0
OsPCS2#3   414>CTCTGCCTCCTCCAGGACTGCCATCTCATCGCATCTACCACAGGAAGCCTTTCAAACAG----->474
          * * * * *
          * * * * *
Genome      641>CTCTTCTTCATTTCAAGGCTTAATAACCAACCAATTTATCATTGCATTGCATTTTCAGACTGGAACCGGCCATTTCTCTC>720
OsPCS2#1   622>-----ACTGGAACCGGCCATTTCTCTC>643
OsPCS2#2   622>-----ACTGGAACCGGCCATTTCTCTC>643
AK071958   1>~~~~~ATTTCAAGGCTTAATAACCAACCAATTTATCATTGCATTGCATTTTCAGACTGGAACCGGCCATTTCTCTC>71
OsPCS2#3   475>-----ACTGGAACCGGCCATTTCTCTC>496
          * * * * *
          * * * * *
Genome      801>CCACTCCCCTGCTTTGGGAAGCCATGAATACAACCTGATGACGCAACTGGTCTACTCAGGGGTTCTTCTCTACCCATC>880
OsPCS2#1   724>CCACTCCCCTGCTTTGGGAAGCCATGAATACAACCTGATGACGCAACTGGTCTACTCAGGGG----->785
OsPCS2#2   724>CCACTCCCCTGCTTTGGGAAGCCATGAATACAACCTGATGACGCAACTGGTCTACTCAGGGG----->785
AK071958   152>CCACTCCCCTGCTTTGGGAAGCCATGAATACAACCTGATGACGCAACTGGTCTACTCAGGGG----->213
OsPCS2#3   577>CCACTCCCCTGCTTTGGGAAGCCATGAATACAACCTGATGACGCAACTGGTCTACTCAGGGG----->638
          * * * * *
          * * * * *
Genome      4721>CCATCTTGATATTTGAAGGTTTCATGCTTATCTCAAGGCACACTGCAGCTCCTTCATTGCTCTACACAGTGGTAAACATGC>4800
OsPCS2#1   786>-----GTTTCATGCTTATCTCAAGGCACACTGCAGCTCCTTCATTGCTCTACACAGTG----->837
OsPCS2#2   786>-----GTTTCATGCTTATCTCAAGGCACACTGCAGCTCCTTCATTGCTCTACACAGTG----->837
AK071958   214>-----GTTTCATGCTTATCTCAAGGCACACTGCAGCTCCTTCATTGCTCTACACAGTG----->265
OsPCS2#3   639>-----GTTTCATGCTTATCTCAAGGCACACTGCAGCTCCTTCATTGCTCTACACA----->687
          * * * * *
          * * * * *
Genome      4801>CAATGCTTGGTATATCGAATTCAGTGGGTACATTTGATATAATTTCTTTTATATCATTCTTTAGCTTTTGTGCAGAGTT>4880
OsPCS2#1   838>-----AGTT>841
OsPCS2#2   838>-----CTTTTGTGCAGAGTT>852
AK071958   266>-----AGTT>269
OsPCS2#3   688>-----CTTTTGTGCAGAGTT>702
          * * * * *
          * * * * *
Genome      4881>GCAGAGATGAAAGCTGGAAAAGCATGGCGAAGTATTGCATGGAAGATGTACCCGATCTTCTTAAGGATGAGAGTGTAGAC>4960
OsPCS2#1   842>GCAGAGATGAAAGCTGGAAAAGCATGGCGAAGTATTGCATGGAAGATGTACCCGATCTTCTTAAGGATGAGAGTGTAGAC>921
OsPCS2#2   853>GCAGAGATGAAAGCTGGAAAAGCATGGCGAAGTATTGCATGGAAGATGTACCCGATCTTCTTAAGGATGAGAGTGTAGAC>932
AK071958   270>GCAGAGATGAAAGCTGGAAAAGCATGGCGAAGTATTGCATGGAAGATGTACCCGATCTTCTTAAGGATGAGAGTGTAGAC>349
OsPCS2#3   703>GCAGAGATGAAAGCTGGAAAAGCATGGCGAAGTATTGCATGGAAGATGTACCCGATCTTCTTAAGGATGAGAGTGTAGAC>782
          * * * * *
          * * * * *
Genome      5041>TAGGAGACAAGAGGAAGGAGGATCAGGATTAAGCAAAGAGGAGGAAGAAAGGCTTATTTTGAAGGTCATCTTCAACCTTT>5120
OsPCS2#1   1002>TAGGAGACAAGAGGAAGGAGGATCAGGATTAAGCAAAGAGGAGGAAGAAAGGCTTATTTTGAAG----->1065
OsPCS2#2   1013>TAGGAGACAAGAGGAAGGAGGATCAGGATTAAGCAAAGAGGAGGAAGAAAGGCTTATTTTGAAG----->1076
AK071958   430>TAGGAGACAAGAGGAAGGAGGATCAGGATTAAGCAAAGAGGAGGAAGAAAGGCTTATTTTGAAG----->493
OsPCS2#3   863>TAGGAGACAAGAGGAAGGAGGATCAGGATTAAGCAAAGAGGAGGAAGAAAGGCTTATTTTGAAG----->926
          * * * * *
          * * * * *
Genome      5121>TCTTTTCAATCTGGGATTCTGGATCAGAATTTTCTTTTGTCTCTTTTAAACACACCTTACACTGTGTGCACTTGCAGGAA>5200
OsPCS2#1   1066>-----GAA>1068
OsPCS2#2   1077>-----GAA>1079
AK071958   494>-----GAA>496
OsPCS2#3   927>-----GAA>929
          * * * * *
          * * * * *
Genome      5681>CTTCATGATGATCTTAAACGAGAGGTTTGTGTATTAATCCAACATCCCTTGCTCCCTACTCCCTAGCAAGATTTGTTT>5760
OsPCS2#1   1549>CTTCATGATGATCTTAAACGAGAG----->1572
OsPCS2#2   1560>CTTCATGATGATCTTAAACGAGAG----->1583
AK071958   977>CTTCATGATGATCTTAAACGAGAG----->1000
OsPCS2#3   1410>CTTCATGATGATCTTAAACGAGAG----->1433
          * * * * *
          * * * * *
Genome      6481>AAAAACATTTGTTGCACTAGTTTGAATAACATTTGTCTGTTGACACAGATATTGCATCTAAGACGGCAACTCCATTAT>6560
OsPCS2#1   1573>-----ATATTGCATCTAAGACGGCAACTCCATTAT>1602
OsPCS2#2   1584>-----ATATTGCATCTAAGACGGCAACTCCATTAT>1613
AK071958   1001>-----ATATTGCATCTAAGACGGCAACTCCATTAT>1030
OsPCS2#3   1434>-----ATATTGCATCTAAGACGGCAACTCCATTAT>1463
          * * * * *
          * * * * *
```

```

Genome      6561>GTGAGGTCCTGTAAAGAGGAGGAATATGGAGATCCTGTGCCACAATCCCATTAACAATGATGCAAATCGCGCAGTTGGTT>6640
OsPCS2#1   1603>GTGAGGTCCTGTAAAGAGGAGGAATATGGAGATCCTGTGCCACAATCCCATTTAAACAATGATGCAAATCGCGCAGTTGGTT>1682
OsPCS2#2   1614>GTGAGGTCCTGTAAAGAGGAGGAATATGGAGATCCTGTGCCACAATCCCATTAACAATGATGCAAATCGCGCAGTTGGTT>1693
AK071958   1031>GTGAGGTCCTGTAAAGAGGAGGAATATGGAGATCCTGTGCCACAATCCCATTAACAATGATGCAAATCGCGCAGTTGGTT>1110
OsPCS2#3   1464>GTGAGGTCCTGTAAAGAGGAGGAATATGGAGATCCTGTGCCACAATCCCATTA~~~~~>1517
          *      *      *      *      *      *      *      *

```

**Supplementary Fig. S1 Alignment of *OsPCS* sequences among genomic sequence, transcripts, and ESTs. (A)** *OsPCSI* genomic sequence, ESTs (CB646798, CK083842, CB646799 and C96924) and transcript sequences (*OsPCSI*#1–4) were compared. *OsPCSI*#4 is the transcript sequence on the RAP-DB (AF439787). **(B)** *OsPCS2* genomic sequence and transcript sequences (*OsPCS2*#1–3) were compared. *OsPCS2*#2 (AK071754) and AK071958 are the transcript sequences on the RAP-DB. White boxes show the start codon and the stop codon. Gray boxes show the splice donor sites (GT) and the splice acceptor sites (AG). Black boxes show the site different from genomic sequence.

```

OsPCS1  MASKPSSRAESNQAAAAPSLYGRALPSPPAVEFASAEGRRLFAEALQGGTMCQFFSLVSVFQTQSEPAFCGLATLAVVLNALRIDPGRR 90
OsPCS2  -----MAAMASLYRRVLPSPPAVEFASAEGRKLFSEALESGTLCGFFNLSVVFQTQSEPAFCGLASLSVVLNALRIDPGRQ 76
TaPCS1  -----MEVASLYRRVLPSPPAVEFASAEGRKLFSEALQGGTMEGFFNLSYVFQTQSEPAFCGLASLSVVLNALRIDPGRP 75
AtPCS1  -----MAMASLYRRSLPSPPAIDFSSAEGKLIIFNEALQKGTMEGFFRLISYVFQTQSEPAFCGLASLSVVLNALRIDPGRK 75
AtPCS2  -----MSMASLYRRSLSPPAIDFASREGKLIIFNEALQKGTMEGFFGLISYVFQTQSEPAFCGLASLSMVLNLSLIDPGRK 74

OsPCS1  WKGPRWRFDESMLDCCCHLDTVRAEGITFGKVACLAHCAGADVRTFRAAQAATLADLRHLLRCASSQDCHLVASYHRKLLGQTGTGHFSP 180
OsPCS2  WKGPRWRFDESMLDCCCEPLDKVKAEGITFAKLACLAHCAGANVRSFRADQSTIHDFFRHLLVRSASSQDCHLVASYHRKLPFKQTGTGHFSP 166
TaPCS1  WKGPRWRFDESMLDCCCEPLHKVKAEGITFGKVVCLAHACAGARVQSFRADQSTIHDFFRAHLTRCASSQDCHLVSSYHRSPFKQTGTGHFSP 165
AtPCS1  WKGPRWRFDESMLDCCCEPLEVVKKGIISFGKVVCLAHCSGAKVEAFRTSQSTIDDFRKFVVKCTSSENCHMISTYHRGVFKQTGTGHFSP 165
AtPCS2  WKGPRWRFDESMLDCCCEPLEVVKKGIISFGKVVCLAHSSGAKVEAFRTNQSTIDDFRKYVVKCTSDNCHMISTYHRQVLKQTGTGHFSP 164

OsPCS1  IGGYHAGCDMALILDVARFKYPPHWIPLPLLWEAMNTIDEATGLLRGFMLISRNTAEPILLIRAVNCRDESWSMAKYCIIEVVFNLLRDN 270
OsPCS2  IGGYHAGCDMALILDVARFKYPPHWVPLPLLWEAMNTIDATGLLRGFMLISRHTAAPSLLYTVSCDESWSMAKYCMEDVPDLLKDES 256
TaPCS1  IGGYHAEKDMALILDVARFKYPPHWVPLTLLWDAMNTIDEATGLLRGFMLVSRSSAPSLLYTVSCGHCSSWSMAKYCMEDVPNLLKDES 255
AtPCS1  IGGYNAERDMALILDVARFKYPPHWVPLKLLWEAMDSIDQSTGKRRGFMLISRPHREPGLLYTISCKDESWEITAKYLKEDVPRLVSSQH 255
AtPCS2  IGGYNAERDMALILDVARFKYPPHWVPLKLLWDAMDSIDQSTGRRRGFMLISRPHREPGLLYTISCKDESWSIAKYLKEDVPRLVSSQH 254

OsPCS1  VDNVLTLLSRLVNHLPFNAGNFIKWWIEVRRQEEGSSPSKEANEMPFLEKQVLLQIRDTKLFQLVHKLQCSKQPCSCSSLTDEDSISQ 360
OsPCS2  VDNVPALLSRLVKSLPANAGNLIKWVIEVRRQEEGSSGLSKEEERLILKEMILQQVROTELFRLVRELOFTKQPCSCSYSSDDDSFTR 346
TaPCS1  IDNVLTLLSRLVSLPANAGDLIKQVIEVRRKEEGESSLSKEEKERLFLKEVLLQIRDTDLFRVVELQYKGLGSCSSSSDDESLIAE 345
AtPCS1  VDSVEKILSVVFKSLPNFNQFIIRWVAEIRITEDSNQNLSAEEKSRLKQLKQLVLEKVEHTELFKHINKFLSTVG-----YEDSLTY 336
AtPCS2  VDTIERILYVVFKSLPANFNQFIKWMAEIRRTEDVQNQLSSEKSRLLKQELLKQVQETKLFKHVDKFLSSV-----YEDNLPY 334

OsPCS1  IAASVCCCEATALLSGNLSRRDGLFFSETQSGCTQVND EGLKNVITGKVVSEGN-GHVDKLSPISSSTETCFONSTLSNETVNYPSNTDILT 449
OsPCS2  IAASVCCQGAALLTGNLSSKDGFCORETOFKCVQVDGDPKTVVTGTAVSGVNEQSVDMLLPISTLETISVCNSNSSEVVKYPSRTDILT 436
TaPCS1  IAATVCCQGAALFSGNLSRRDGLFFSETQSGCTQVND EGLKNTVITGKVVSEGN-GHVDKLSPISSSTETCFONSTLSNETVNYPSNTDILT 435
AtPCS1  AAAKACCQGAELLSG--SPSKEFCCRETQVCKIKGPDDESGTVVTVGVVVRDNEQKVDLLVPSTQTCECGPE-----ATYPAQNDVFT 418
AtPCS2  VAAKVMCDGDEILLSG--YESDESCKETQVCKIKGLGEEKVTVA-----YPSGNDVFT 386

OsPCS1  VLLLSLHPSSTWLGITDEKLLKAEFQSLVSTDDLDPDLKLEILHLRRQLRYLKACREKEAYEDTWQPWQC 519
OsPCS2  VLLLALHPSSTWVGIKDERLLKAEFQSLISTDILHDDLKREILHLRRQLHYVRSCKEIEEYGDVPVQSH--- 502
TaPCS1  VLLLVLPQNTWLGIKDENVKAEFQSLVSTDNLPDLLKQELHLRRQLHYLAGCKGQEAQCEP-RSP--- 500
AtPCS1  ALLLALPPQNTWVGIKDQALMHEMKQLISMASLPTLLQEEVHLHLRRQLQLKRCQENKEEDDLAAPAY--- 485
AtPCS2  ALLLALPPQNTWVGIKDQSLQEMKQLISMVSHPTLLQEEVHLHLRRQLEMLKRCQENKEEELSAPE--- 452

```

**Supplementary Fig. S2** Alignment of predicted amino acid sequences of PC synthase from rice, *Arabidopsis*, and wheat. Black boxes show identical amino acid residues. Gray boxes show similar amino acid residues. Alignment was conducted by ClustalW in the DNA Data Bank of Japan (DDBJ). Accession number of the sequences is as following. AtPCS1: AAD50593, AtPCS2: AAK94671, TaPCS1: AAD50592.

```

OsPCS1      1 -----AC      2
OsPCS2      1 GCATCTAAGACGGCAACTCCATTATGTGAGGTCCTGTAAAGAGGAGGAAT      50
OsPCS1      3 ATGG-----CAA-CCCACTCACTTAATAATGAATTTTCGCTGT      38
OsPCS2      51 ATGGAGATCCTGTGCCACAATCCCATTAAC--AATGATGCAAATCGC---      95
OsPCS1      39 TCACTGGGCCTTTGGTTGCTGGCTTAACCTTACTGGAAATGACGCGAAA      88
OsPCS2      96 -----GCAGTTGGTT-----ACC---CTGGA---GATGCAAAA      122
OsPCS1      89 AGAAAAGGTTAGGATGTTAGGAGAGGAGGTGAAAA-----TAT      126
OsPCS2     123 AAAAGGGGTT-----AGAGGAGG---AACTACATACTCCGTAT      157
OsPCS1     127 TACCTCCTTTTCAAATAAGGACTATATAACAATTTTCTGATAATAATGA      176
OsPCS2     158 TACCTTTGTTTCGAGTGAGGAC-----TTCTCAT-----      186
OsPCS1     177 TGTTTT--GCAATTGGC--AAGTACTTTGCAACCGTGAAG-TATCTTTC      221
OsPCS2     187 --TTTTGAGACACCTGACCTGAG-AC---GGATCCGTGTAGACATGTT--      228
OsPCS1     222 CTTGCTTAATTTCTCTTTTGT--TTTCCCTGTACTTCTGATAGTTCCA      269
OsPCS2     229 CATGTTCA---TCACCTGTGGTCGTTTCTCTTGT-----TAGTGACA      267
OsPCS1     270 --TGACTTTATTCCCTCTAATTAATGGATAAGCACACTTAGCT-----      311
OsPCS2     268 ACTG-AC-----AACTAGCGGGGAGGCACAC---GCTAATTGT      301
OsPCS1     312 -----CGTCCT-----      317
OsPCS2     302 GCGGCTGGTGTCTCTTGCAAAAGTTTC      327

```

**Supplementary Fig. S3 Alignment of RNAi trigger sequences of 3'-UTR in *OsPCS1* and *OsPCS2*.**

A segment of 317 bp or 327 bp in the 3' untranslated region specific to *OsPCS1* or *OsPCS2*, respectively, was used for the RNAi trigger. Global alignment of two nucleotide sequences was conducted by the EMBOSS Needle. Nucleotide sequence identity is 39.9%.

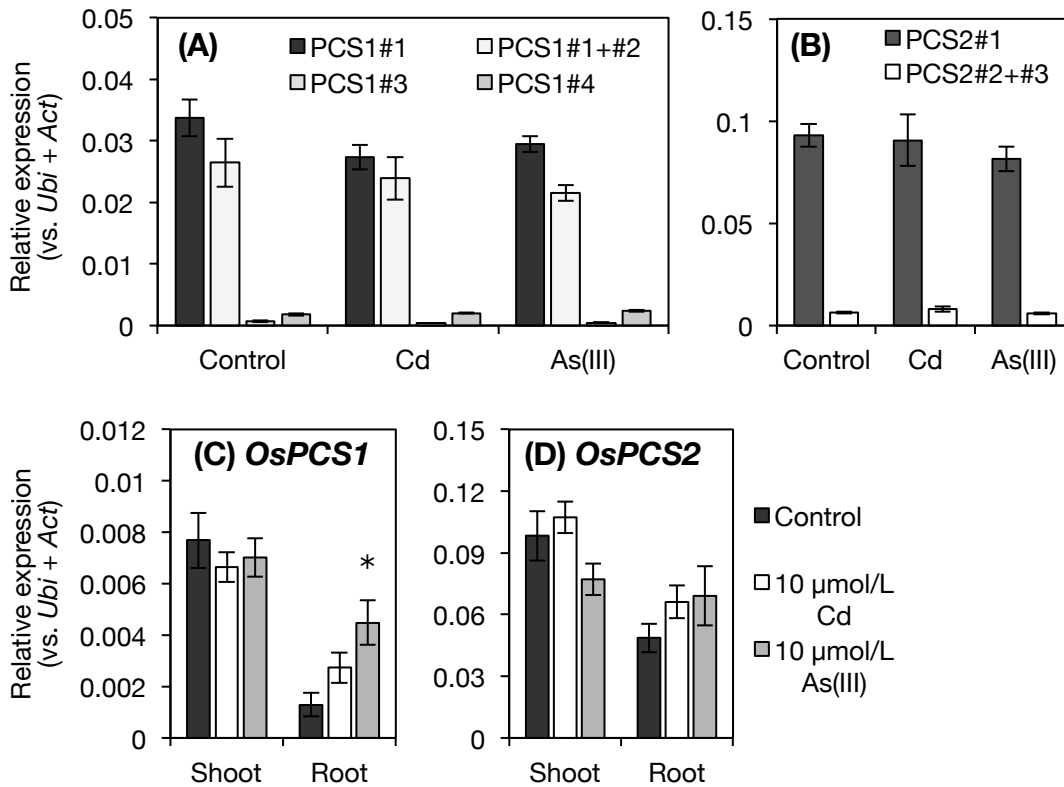

**Supplementary Fig. S4 Expression levels of *OsPCS*.** (A, B) Relative expression of *OsPCS1* and *OsPCS2* transcriptional variants in shoots under control conditions and heavy metal toxicity. Specific primers for each transcript were used. (C, D) Total expression levels of *OsPCS1* and *OsPCS2*. Common primers to all of the variants were used. The expression level was analyzed by quantitative RT-PCR in 10-day-old seedlings hydroponically grown under control, Cd stress (10  $\mu\text{mol L}^{-1}$  CdSO<sub>4</sub>), or As(III) stress (10  $\mu\text{mol L}^{-1}$  NaAsO<sub>2</sub>) condition. *Ubiquitin* and *Actin* were used as internal standards. Values are expressed as means  $\pm$  SE ( $n = 4$ ). An asterisk (\*) shows a significant difference from the control ( $p < 0.05$ , Dunnett test).

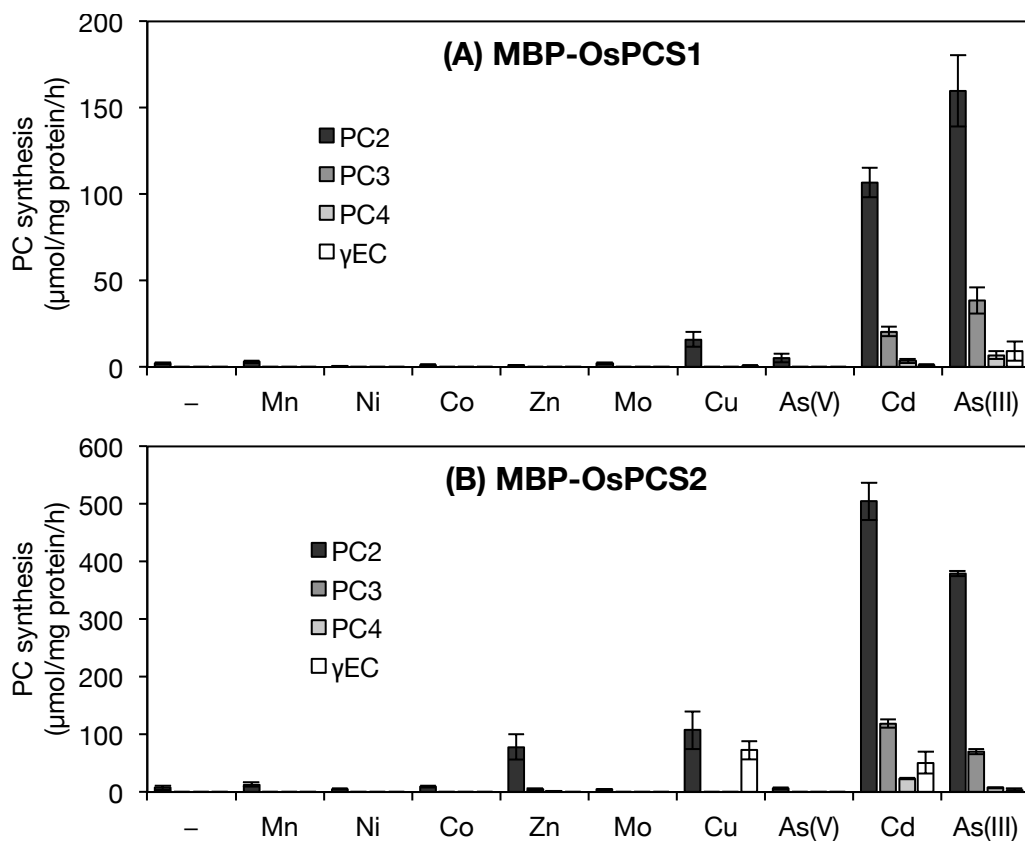

**Supplementary Fig. S5 Activation of MBP-OsPCS by various heavy metals/metalloids.** PC synthesis catalyzed by (A) OsPCS1 and (B) OsPCS2 in the presence of different heavy metals/metalloids. Purified MBP-OsPCS1 ( $15 \mu\text{g mL}^{-1}$ ) or MBP-OsPCS2 ( $5 \mu\text{g mL}^{-1}$ ) was incubated for 1 h in the reaction medium containing  $10 \text{ mmol L}^{-1}$  GSH,  $200 \text{ mmol L}^{-1}$  HEPES-KOH buffer (pH8.0), and  $50 \mu\text{mol L}^{-1}$  of the metal ion indicated. The reaction was stopped by the addition of TFA at a final concentration of 1% (v/v). PC<sub>2-4</sub> and  $\gamma\text{EC}$  were derivatized with monobromobimane and quantified by HPLC-fluorescent detection. Values are expressed as means  $\pm$  SE from three independent experiments.



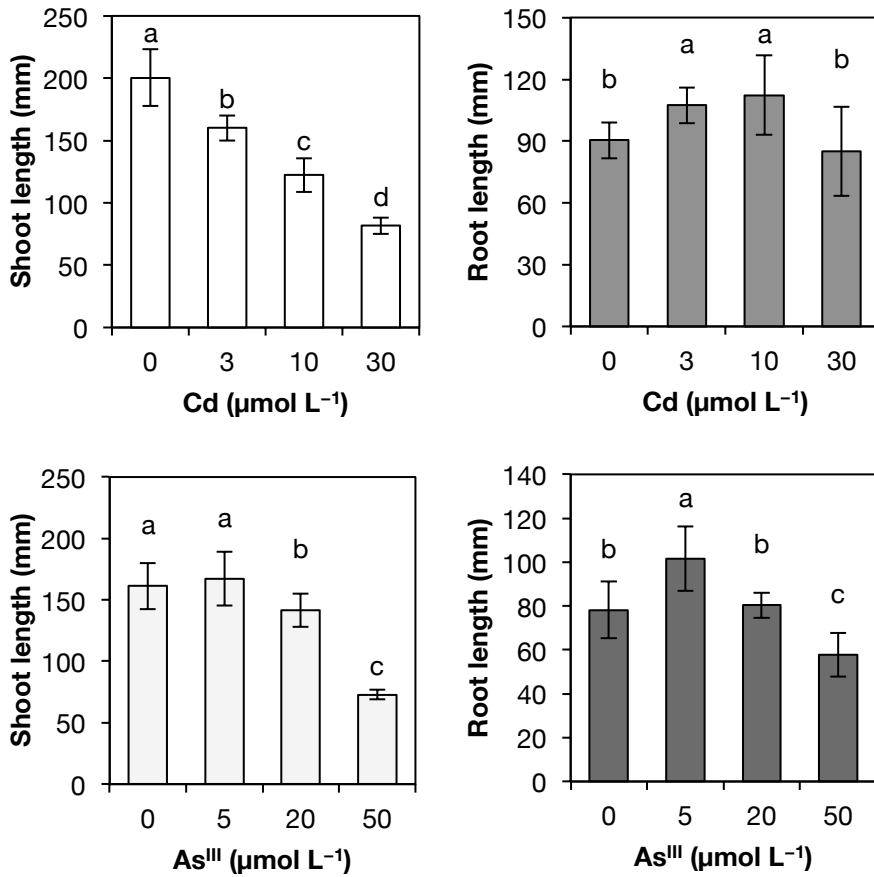

**Supplementary Fig. S6 Growth of WT plants under Cd or As(III) stress.**

Shoot and root lengths of WT plants under Cd or As(III) stress. WT plants (cv. Nipponbare) were hydroponically grown in the culture solution containing 3, 10, or 30  $\mu\text{mol L}^{-1}$  Cd or 5, 20, or 50  $\mu\text{mol L}^{-1}$  As(III) and the control culture solution for 10 days. Values are expressed as means  $\pm$  SD (Cd:  $n \geq 14$ , As:  $n \geq 10$ ). Different letters show a significant difference ( $p < 0.05$ , Tukey test).

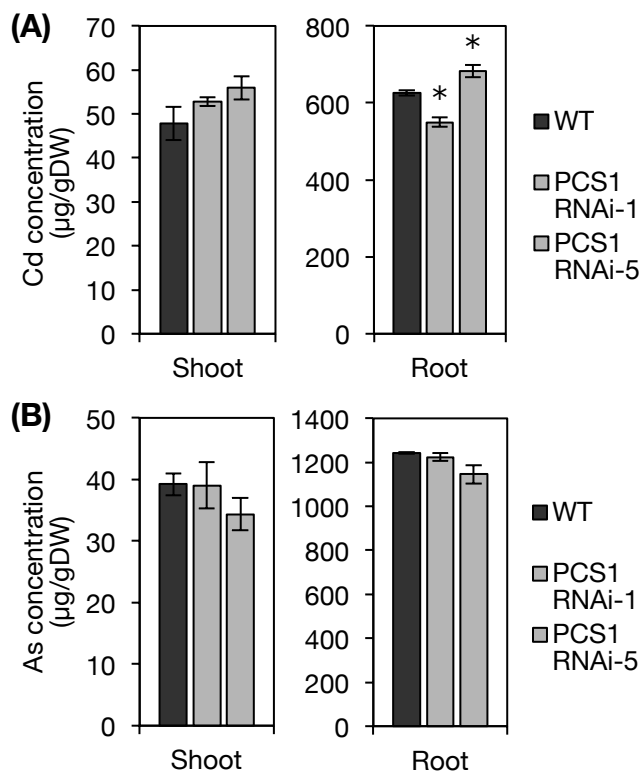

**Supplementary Fig. S7 Cd and As concentrations in *OsPCS1* RNAi plants.** (A) Cd concentration in shoots (left) and roots (right). (B) As concentration in shoots (left) and roots (right). WT and *OsPCS1* RNAi plants were hydroponically grown in a culture solution containing  $10 \mu\text{mol L}^{-1}$  Cd or  $20 \mu\text{mol L}^{-1}$  As(III) for 10 days. Each plant was separated into shoots and roots and oven-dried. After digestion with  $\text{HNO}_3$  and  $\text{HClO}_4$ , Cd concentration was analyzed by atomic absorption spectroscopy and As concentration was analyzed by inductively coupled plasma atomic emission spectroscopy. Values are expressed as means  $\pm$  SE ( $n = 4$ ). An asterisk (\*) shows a significant difference from WT plants ( $p < 0.05$ , Dunnett test).

**Supplementary Table S1 Identity and similarity of predicted amino acid sequences of PC synthase from rice, *Arabidopsis*, and wheat.**

| Identity   | OsPCS1 | OsPCS2 | AtPCS1 | AtPCS2 | TaPCS1 |
|------------|--------|--------|--------|--------|--------|
| OsPCS1     | -      | 69.6%  | 49.2%  | 46.9%  | 67.5%  |
| OsPCS2     | 69.6%  | -      | 56.5%  | 52.5%  | 76.3%  |
| Similarity |        |        |        |        |        |
| OsPCS1     | -      | 80.4%  | 65.8%  | 62.5%  | 77.9%  |
| OsPCS2     | 80.4%  | -      | 71.2%  | 67.7%  | 86.7%  |

Global alignment of two protein sequences was conducted by EMBOSS Needle. Accession number of the sequences is as following. AtPCS1: AAD50593, AtPCS2: AAK94671, TaPCS1: AAD50592.

**Supplementary Table S2 The concentration of thiol peptides in rice plants treated with BSO.**

|       |         | Thiol peptides (nmol g <sup>-1</sup> DW) |                 |                 |                 |       |      |      |
|-------|---------|------------------------------------------|-----------------|-----------------|-----------------|-------|------|------|
|       |         | GSH                                      | PC <sub>2</sub> | PC <sub>3</sub> | PC <sub>4</sub> | hmGSH | γECE | γEC  |
| -BSO  |         |                                          |                 |                 |                 |       |      |      |
| Shoot | Control | 48.0                                     | -               | -               | -               | 25.3  | -    | -    |
|       | Cd      | 119                                      | -               | -               | -               | 118   | 28.4 | 33.4 |
|       | As(III) | 156                                      | -               | -               | -               | 160   | 79.0 | 50.8 |
| Root  | Control | 240                                      | -               | -               | -               | 161   | -    | -    |
|       | Cd      | 188                                      | 50.4            | 53.8            | 5.80            | 790   | 221  | 208  |
|       | As(III) | 444                                      | 532             | 203             | 11.0            | 1310  | 1260 | 1230 |
| +BSO  |         |                                          |                 |                 |                 |       |      |      |
| Shoot | Control | 10.5                                     | -               | -               | -               | -     | -    | -    |
|       | Cd      | 8.84                                     | -               | -               | -               | -     | -    | -    |
|       | As(III) | 21.1                                     | -               | -               | -               | 6.24  | 4.96 | 12.2 |
| Root  | Control | 7.04                                     | -               | -               | -               | -     | -    | -    |
|       | Cd      | 10.6                                     | -               | -               | -               | -     | -    | -    |
|       | As(III) | 38.1                                     | -               | -               | -               | -     | 21.1 | 65.3 |

The 7-day-old seedlings of Nipponbare were transferred to a culture solution containing 10 μmol L<sup>-1</sup> Cd or As(III) either alone or in combination with 0.5 mmol L<sup>-1</sup> BSO. Controls without toxic metals were also tested. At 7 days after transfer, the concentration of thiol peptides in the shoots and roots was determined for a bulked sample of each treatment.

**Supplementary Table S3 The sequences of primer used in this study.**

| For sequence analysis            |                                                  |
|----------------------------------|--------------------------------------------------|
| PCS1.seq1F                       | 5'-CCAGACTGGAACAGGGCATT-3'                       |
| PCS1.seq2F                       | 5'-GCCCTACCCTATCCAGCCTA-3'                       |
| PCS1.seqR                        | 5'-AGGACGAGCTAAGTGTGCTT-3'                       |
| PCS1-2.3.R                       | 5'-TCAATGCAAGGTTCTAGGAGTGAG-3'                   |
| PCS2.seqF                        | 5'-AAGCAAGACGCGTCAAATCT-3'                       |
| PCS2.seq1R                       | 5'-GAAACTTTTGCAAGGACACCA-3'                      |
| PCS2.seq2R                       | 5'-TTTGACAACCTCGTTGCTTG-3'                       |
| For expression analysis          |                                                  |
| PCS1-1.ex-F                      | 5'-AACTGGAGATATTGCACCTAAGGA-3'                   |
| PCS1-1.ex-R                      | 5'-GCCCAGTGAACAGCGAAA-3'                         |
| PCS1-1.2.ex-F                    | 5'-GCATGGCAAAGTATTGCATAGAAG-3'                   |
| PCS1-1.2.ex-R                    | 5'-TCCAGCATTGGGAGGAAGA-3'                        |
| PCS1-3.ex-F                      | 5'-GGCTTCTCAGGGGTGGTAAA-3'                       |
| PCS1-4.ex-F                      | 5'-CTTTATTGATCCGTGCAGTGGTA-3'                    |
| PCS1-3.4.ex-R                    | 5'-ATCCTCCTTCCTCTTGTCTCCTAAC-3'                  |
| PCS2-1.ex-F                      | 5'-CATTGCTCTACACAGTGAGTTGC-3'                    |
| PCS2-1.ex-R                      | 5'-ATTTCACTAAGCGGGACAGAAG-3'                     |
| PCS2-2.ex-F                      | 5'-TTTGGGAAGCCATGAATACAAC-3'                     |
| PCS2-2.ex-R                      | 5'-TTTCATCTCTGCAACTCTGCAC-3'                     |
| Ubiquitin. F                     | 5'-AGAAGGAGTCCACCCTCCACC-3'                      |
| Ubiquitin. R                     | 5'-GCATCCAGCACAGTAAAACACG-3'                     |
| Actin1. F                        | 5'-ATCCTTGTATGCTAGCGGTCGA-3'                     |
| Actin1. R                        | 5'-ATCCAACCGGAGGATAGCATG-3'                      |
| PCS1.total.ex-F                  | 5'-TCGCTTCAAATACCCTCCTCA-3'                      |
| PCS1.total.ex-R                  | 5'-TCACTGCACGGATCAATAAAGG-3'                     |
| PCS2.total.ex-F                  | 5'-CTTTGGGAAGCCATGAATACAAC-3'                    |
| PCS2.total.ex-R                  | 5'-TTCCAGCTTTCATCTCTGCAAC-3'                     |
| For recombinant protein analysis |                                                  |
| PCS1.proF                        | 5'- <b>ATGGCGTCTAAACCAAGCAGC</b> -3'             |
| PCS1-1.proR                      | 5'-ACTGCCTGCAGG <b>TTAGC</b> ATTGTTCCCAAGGTTG-3' |
| PCS2.proF                        | 5'- <b>ATGGCAGCGATGGCATCCCT</b> -3'              |
| PCS2-1.proR                      | 5'-GAGTCCTGCAGG <b>TTAATGGG</b> ATTGTGGCACAG-3'  |
| For RNAi trigger                 |                                                  |
| PCS1.RNAi.F                      | 5'- <u>CACC</u> ACATGGCAACCCACTCACTT-3'          |
| PCS2.RNAi.F                      | 5'- <u>CACCG</u> CATCTAAGACGGCAACTCC-3'          |
| PCS2.RNAi.R                      | 5'-GAAACTTTTGCAAGGACACCA-3'                      |
